# Supplementary material for: The Transcription Factor T-bet Regulates Intestinal Inflammation Mediated by Interleukin-7 Receptor+ Innate Lymphoid Cells
Source: PubMed Central journal article supplement (PMC3540260; doi:10.1016/j.immuni.2012.09.008), 2012-10-19
Supplement: mmc1.pdf [file mmc1.pdf]

**Immunity, Volume 37**

## **Supplemental Information**

### **The Transcription Factor T-bet Regulates Intestinal Inflammation Mediated by Interleukin-7 Receptor<sup>+</sup> Innate Lymphoid Cells**

Nick Powell, Alan W. Walker, Emilie Stolarczyk, James B. Canavan, M. Refik Gökmen, Ellen Marks, Ian Jackson, Ahmed Hashim, Mike A. Curtis, Richard G. Jenner, Jane K. Howard, Julian Parkhill, Thomas T. MacDonald, and Graham M. Lord

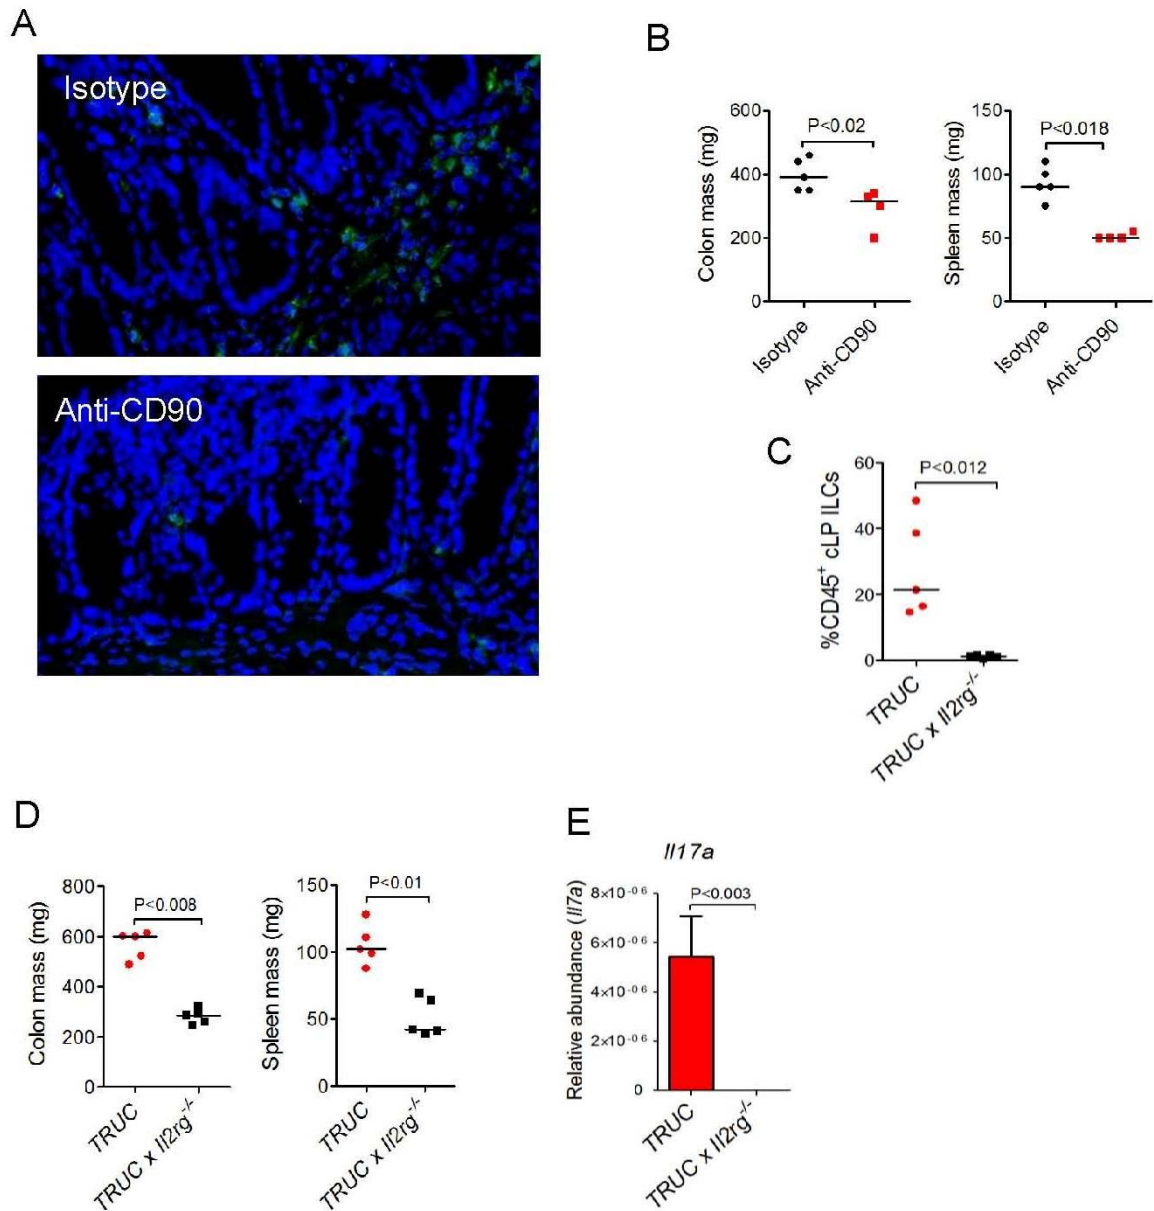

**Figure S1. Chronic Intestinal Inflammation in TRUC Mice Is Dependent on Innate Lymphoid Cells**

(A) Immunofluorescence (x20 magnification) staining for CD90 (green) in the cLP of TRUC mice treated with anti-CD90 or control antibody (IgG2b). Nuclei are counterstained with DAPI. (B) Colon mass and spleen mass in TRUC mice following treatment with depleting anti-CD90 mAb or control Isotype. (C) Proportion (%) of CD90<sup>high</sup> ILCs (as a proportion of live, CD45<sup>+</sup>) cLP cells in TRUC (n=5) and *Tbx21*<sup>-/-</sup>*Rag2*<sup>-/-</sup>*Il2rg*<sup>-/-</sup> (n=5) mice. (D) Colon mass and spleen mass in TRUC (n=5) and *Tbx21*<sup>-/-</sup>*Rag2*<sup>-/-</sup>*Il2rg*<sup>-/-</sup> mice (n=5). (E) Real time PCR quantifying *Il17a* transcripts in the colon of TRUC (n=14) and *Tbx21*<sup>-/-</sup>*Rag2*<sup>-/-</sup>*Il2rg*<sup>-/-</sup> (n=5) mice. Results show mean, and error bars represent SEM.

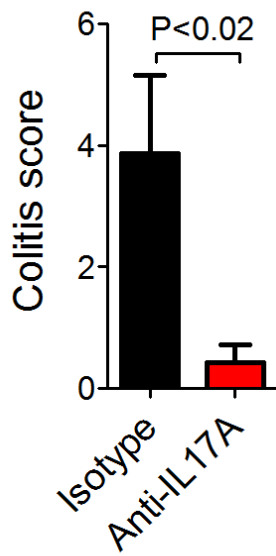

**Figure S2. IL-17A Blockade Significantly Reduced Colitis Histology Scores in TRUC Mice**

(A) Colitis scores in TRUC mice treated with anti-IL-17A (n=7) or isotype control mAb (n=8). Results show mean, and error bars represent SEM.

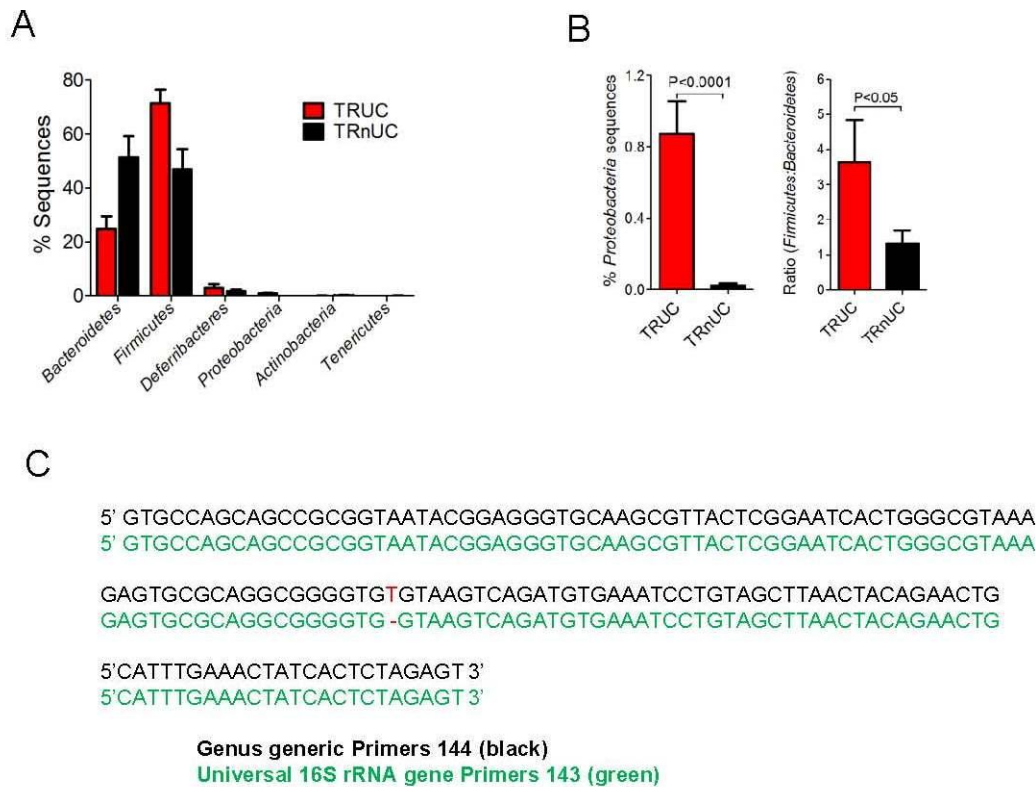

**Figure S3. *Tbx21*<sup>-/-</sup>*Rag2*<sup>-/-</sup> Mice with and without Colitis Have Distinct Intestinal Microbiota Community Profiles**

(A) Mean phylum level differences in the intestinal microbiota from TRUC (n=4) and TRnUC (n=8) mice following sequencing of bacterial 16S rRNA genes. Results show mean, and error bars represent SEM. (B) Proportion (%) of sequences from the *Proteobacteria* phylum (left panel) and the ratio of *Firmicutes* to *Bacteroidetes* (right panel) in the intestinal microbiota of TRUC (n=4) and TRnUC (n=8) mice following sequencing bacterial 16S rRNA genes. Results show mean, and error bars represent SEM. (C) 2% Agarose gel electrophoresis of a *Helicobacter* genus-generic PCR performed on a fresh fecal sample from 12 week old TRUC mouse (upper panel). The band was excised and DNA sequenced. Positive (+) and negative (-) controls are illustrated. (D) The sequence of the PCR product (black sequence) was compared with archived DNA sequences in the NCBI GenBank database and with the amplicons generated using the universal bacterial primer sets for 454 sequencing (green sequence), which confirmed that the *Helicobacter* present in the feces of TRUC mice shared >99% 16S rRNA gene sequence similarity with *H. typhlonius*. Other potentially confounding infections were excluded using the commercially available PRIA panel (Charles River Laboratories, UK) (data not shown) .

A

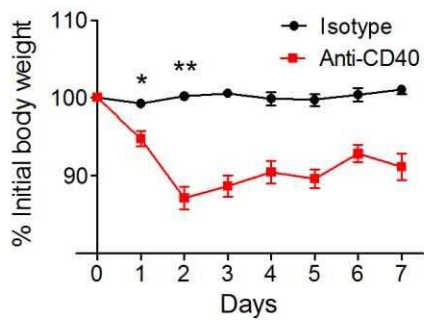

B

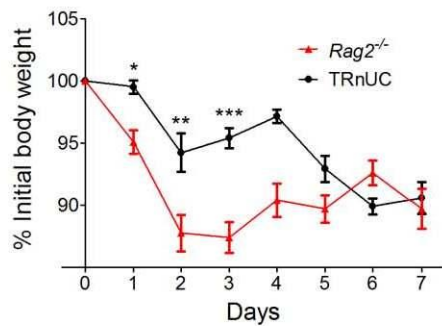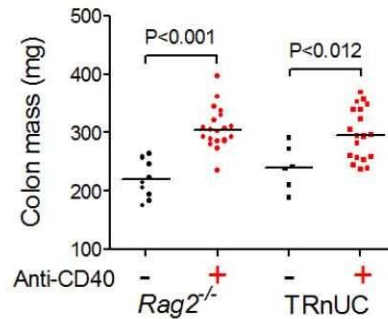

**Figure S4. Agonistic CD40 mAbs Induced Wasting Disease in *Rag2*<sup>-/-</sup> and TRnUC Mice**

(A) Weight loss (as a % on initial bodyweight) in anti-CD40 (n=7, red line) or control mAb (n=6, black line) treated mice. \*P<0.007, \*\*P<0.002. Results show mean, and error bars represent SEM. (B) Weight loss (as a % on initial bodyweight, left panel) and colon mass (right panel) in *Rag2*<sup>-/-</sup> and TRnUC mice following anti-CD40 treatment. \*P<0.0005, \*\*P<0.01. \*\*\*P<0.001. Results show mean, and error bars represent SEM.

**Table S1. Organisms Identified in the Intestinal Microbiota of TRUC Mice that Were Absent from TRnUC Mice**

| NCBI BLAST ID                                                             | Phylum | Family                              | Genus                                       | p Value              |
|---------------------------------------------------------------------------|--------|-------------------------------------|---------------------------------------------|----------------------|
| <i>Helicobacter typhlonius</i>                                            | P      | <i>Helicobacteraceae</i><br>(100)   | <i>Helicobacter</i> (100)                   | $<2 \times 10^{-9}$  |
| clone SWPT20_aaa01b08<br>( <i>Parasutterella excrementihominis</i> , 94%) | P      | <i>Alcaligenaceae</i> (100)         | <i>Parasutterella</i> (100)                 | $<1 \times 10^{-10}$ |
| <i>Parabacteroides distasonis</i>                                         | B      | <i>Porphyromonadaceae</i><br>(100)  | <i>Parabacteroides</i> (100)                | $<1 \times 10^{-10}$ |
| clone mcbc135 ( <i>Bacteroides splanchnicus</i> , 91%)                    | B      | <i>Porphyromonadaceae</i><br>(97)   | <i>Odoribacter</i> (96)                     | 0.012                |
| <i>Alistipes shahii</i>                                                   | B      | <i>Rikenellaceae</i> (100)          | <i>Alistipes</i> (100)                      | $<1 \times 10^{-10}$ |
| clone ncd889c07c1 ( <i>Rikenella microfus</i> , 89%)                      | B      | unclassified                        | unclassified                                | $<1 \times 10^{-10}$ |
| <i>Anaerotruncus colihominis</i>                                          | F      | <i>Ruminococcaceae</i><br>(100)     | <i>Acetanaerobacterium</i> (72)             | $<5 \times 10^{-10}$ |
| clone myd3_aaa01e03, 98%<br>( <i>Coprobacillus cateniformis</i> , 94%)    | F      | <i>Erysipelotrichaceae</i><br>(100) | <i>Coprobacillus</i> (59)                   | $7 \times 10^{-5}$   |
| clone nby399h05c1<br>( <i>Eubacterium plexicaudatum</i> , 93%)            | F      | <i>Lachnospiraceae</i> (73)         | unclassified                                | $<6 \times 10^{-5}$  |
| clone nby337c02c1<br>( <i>Clostridium algidixylanolyticum</i> , 97%)      | F      | <i>Lachnospiraceae</i> (100)        | Unclassified<br><i>Lachnospiraceae</i> (79) | $<0.0004$            |

|                                                                |   |                             |                                             |                      |
|----------------------------------------------------------------|---|-----------------------------|---------------------------------------------|----------------------|
| clone LKMC046 ( <i>Clostridium algidixylanolyticum</i> , 92%)  | F | <i>Lachnospiraceae</i> (95) | Unclassified<br><i>Lachnospiraceae</i> (66) | $<3 \times 10^{-10}$ |
| clone HTM1039Pw-B48, 90% ( <i>Clostridium piliforme</i> , 88%) | F | unclassified                | unclassified                                | $<1 \times 10^{-10}$ |

Phylum Key: P = *Proteobacteria*, B = *Bacteroidetes*, F = *Firmicutes*. Phylum, Family and Genus classifications were generated using the RDP Classifier tool (Cole et al., 2009). Figures in brackets indicate the percentage probability for each RDP classification

**Table S2. Barcodes Used for Each 454-Sequenced Mouse Fecal Sample**

| <b>Sample</b> | <b>Barcode and 16S rRNA Gene Primer</b> |
|---------------|-----------------------------------------|
| TRUC1         | GACTGTGTCCGTCAATTCMTTTRAGT              |
| TRUC2         | GAGACTGACCGTCAATTCMTTTRAGT              |
| TRUC3         | GAGAGTGTCCGTCAATTCMTTTRAGT              |
| TRUC4         | GAGTAGTGCCGTCAATTCMTTTRAGT              |
| TRnUC1        | GAGTCTGTCCGTCAATTCMTTTRAGT              |
| TRnUC2        | GAGTGTGACCGTCAATTCMTTTRAGT              |
| TRnUC3        | GATCTGCACCGTCAATTCMTTTRAGT              |
| TRnUC4        | GATGTGCTCCGTCAATTCMTTTRAGT              |
| TRnUC5        | GACACTGTCCGTCAATTCMTTTRAGT              |
| TRnUC6        | GACAGTGACCGTCAATTCMTTTRAGT              |
| TRnUC7        | GACTAGAGCCGTCAATTCMTTTRAGT              |
| TRnUC8        | GACTCTGACCGTCAATTCMTTTRAGT              |

The primer sequences were as follows:

357F -*CTATCCCCTGTGTGCCTTGGCAGTCTCAGACTCCTACGGGAGGCAGCAG* and 926R-  
**CCATCTCATCCCTGCGTGTCTCCGACTCAG**-barcode\_sequence-CCGTCAATTCMTTTRAGT, where bases  
in italics are the 454 Lib-L 'B' adaptor and bases in bold are the 454 Lib-L 'A' adaptor.
